# Supplementary material
Source: PubMed Central journal article supplement (PMC4058888)
Supplement: NIHMS576298-supplement-01.pdf [file NIHMS576298-supplement-01.pdf]

a

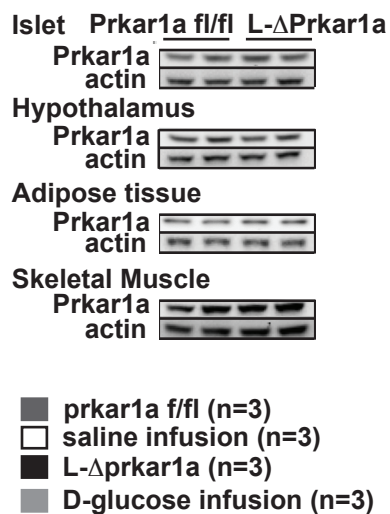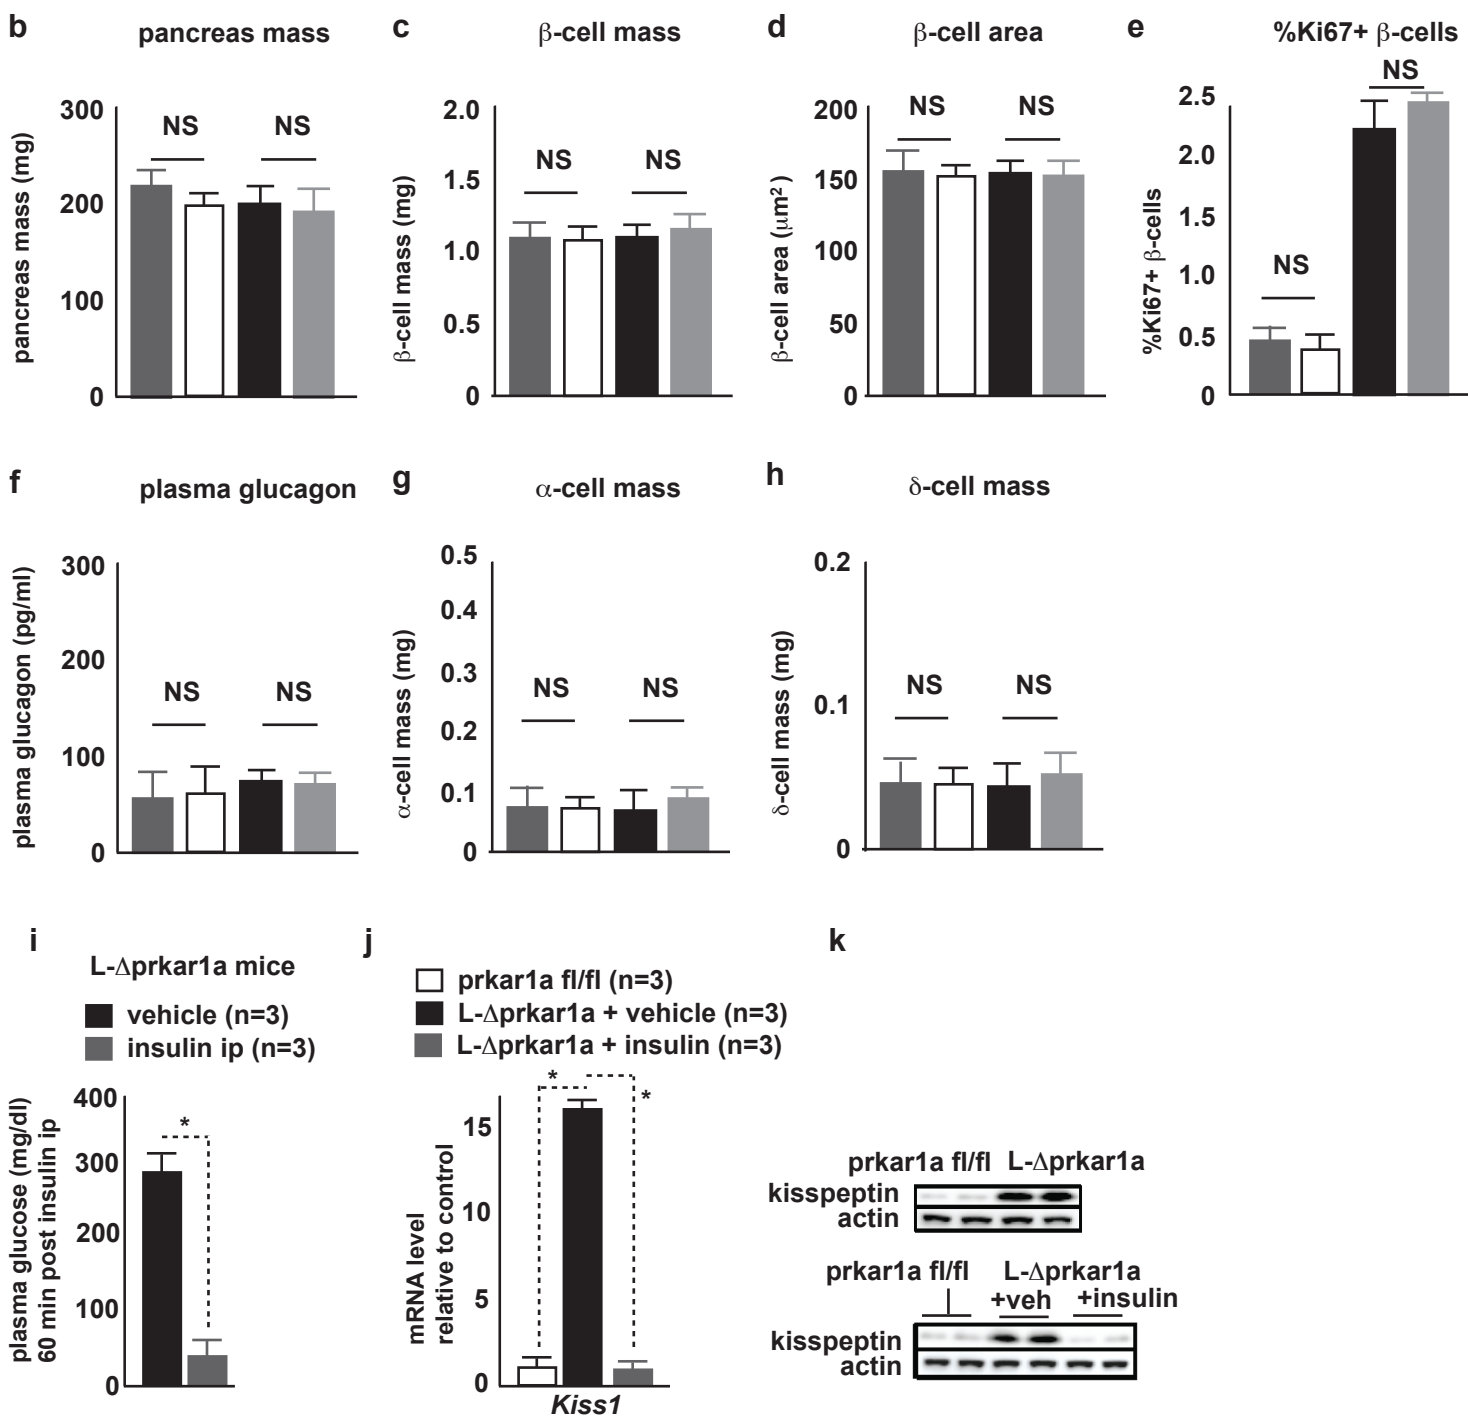

## a H2.35 hepatoma cells

□ DMSO (n=3)  
 ■ forskolin+IBMX (n=3)  
 ■ glucagon (n=3)

1 kb mKiss1 promoter

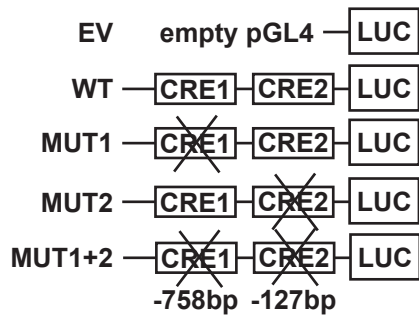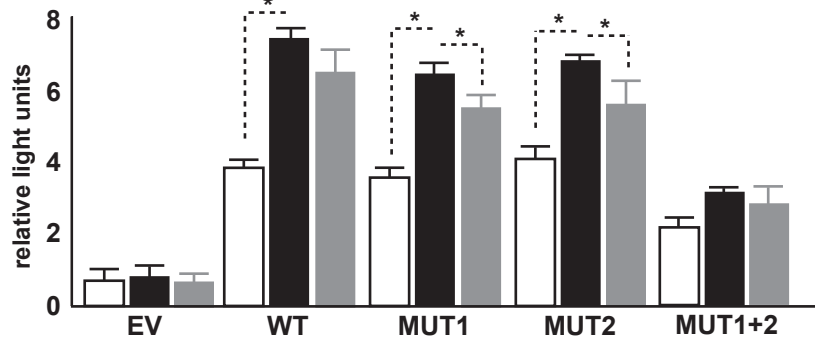

## b H2.35 hepatoma cells

□ Kiss1-LUC + pcDNA (n=3)  
 ■ Kiss1-LUC + pcCREB Y134F (n=3)

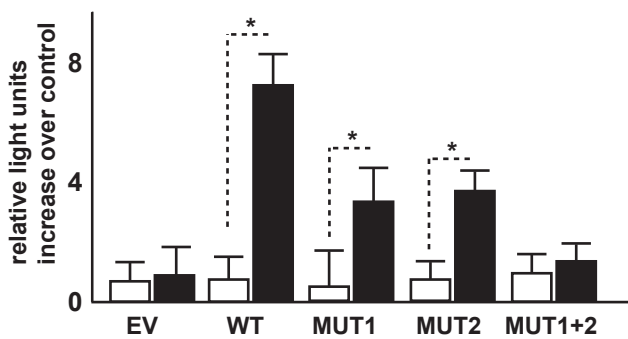

## c H2.35 hepatoma cells

□ DMSO (n=3)  
 ■ forskolin+IBMX (n=3)

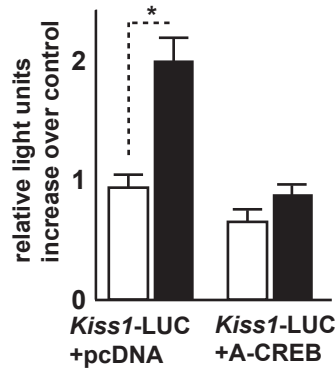

## d mouse liver

□ control serum (n=3)  
 ■ Anti-CREB serum (n=3)

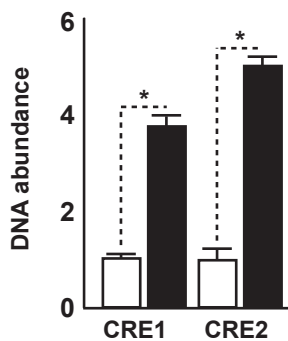

## e wild-type mice

□ ad lib fed (n=4)  
 ■ O/N fasted (n=4)  
 ■ refed (n=4)

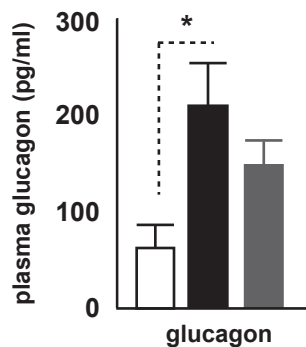

## f

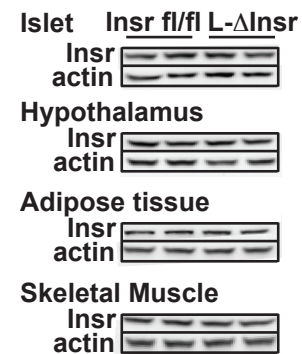

g □ Gcgr fl/fl + PBS (n=3)  
 ■ L-ΔGcgr + PBS (n=3)  
 ■ Gcgr fl/fl + GCGN (n=3)  
 ■ L-Δgcgr + GCGN (n=3)

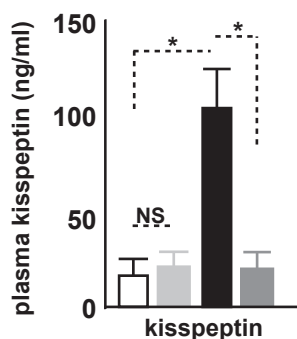

h □ Gcgr fl/fl ad lib fed (n=3)  
 ■ L-ΔGcgr ad lib fed (n=3)  
 ■ Gcgr fl/fl O/N fasted (n=3)  
 ■ L-Δgcgr O/N fasted (n=3)

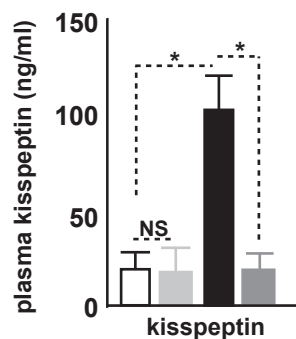

i □ Insr fl/fl + PBS (n=3)  
 ■ L-ΔInsr + PBS (n=3)  
 ■ Insr fl/fl + GCGN (n=3)  
 ■ L-ΔInsr + GCGN (n=3)

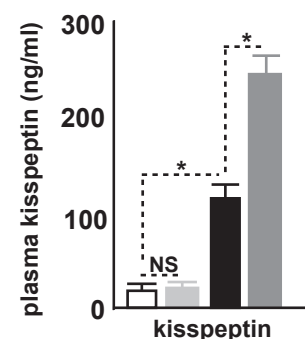

**a Strategy for generating floxed Gcgr mouse**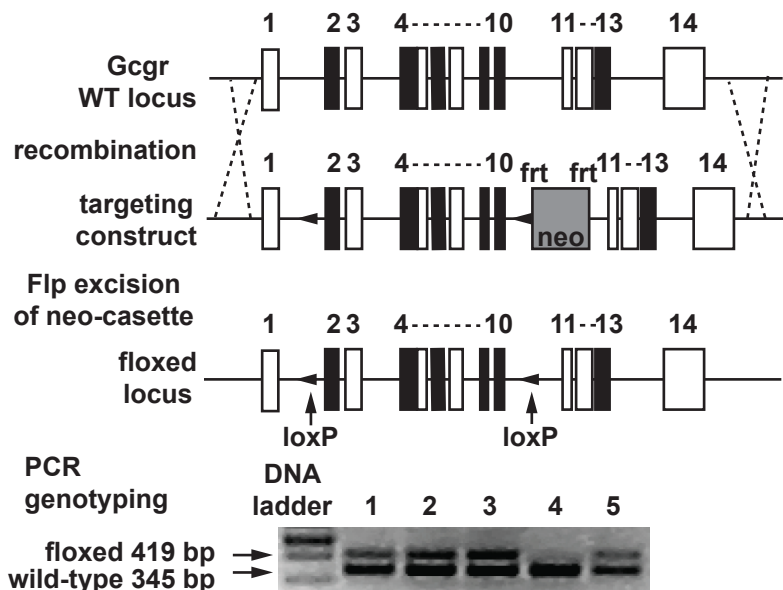**b Adenovirus mediated hepatic CRE transduction ablates GCGR in Gcgr fl/fl mice**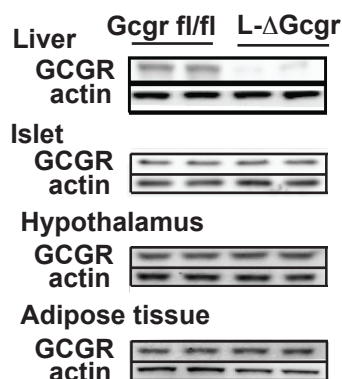**c ip glucose tolerance test**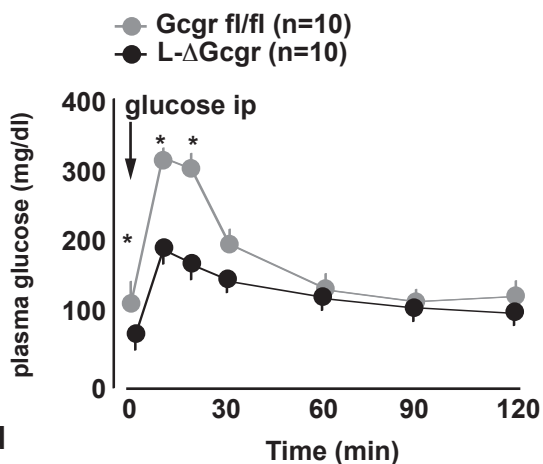**d ip insulin tolerance test**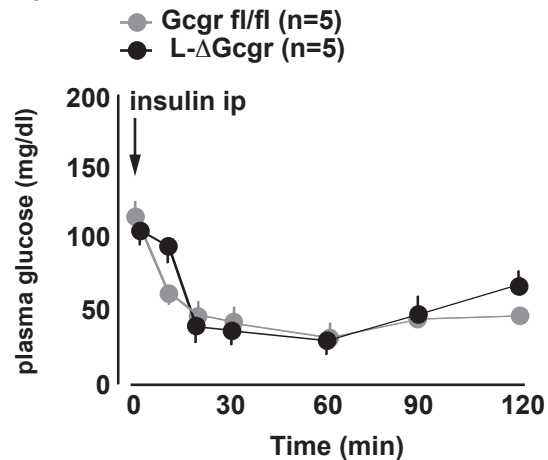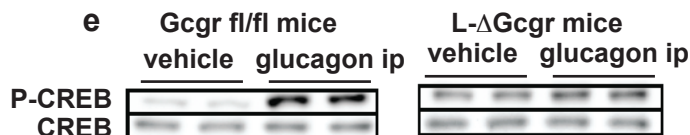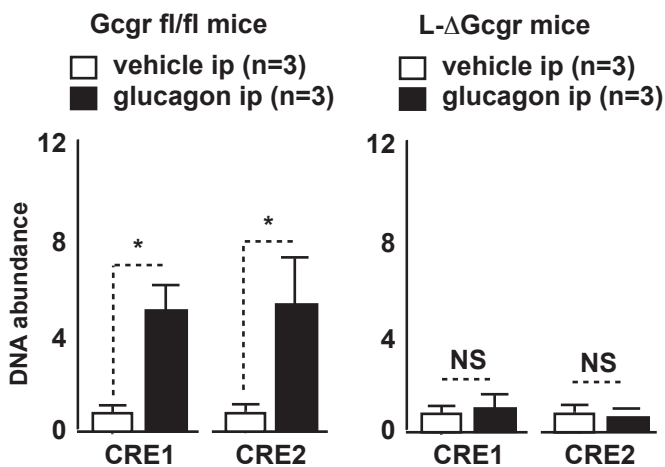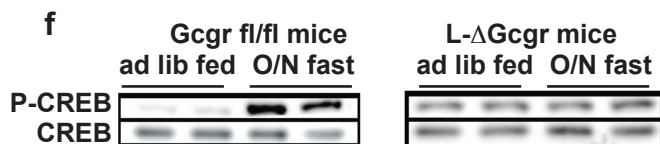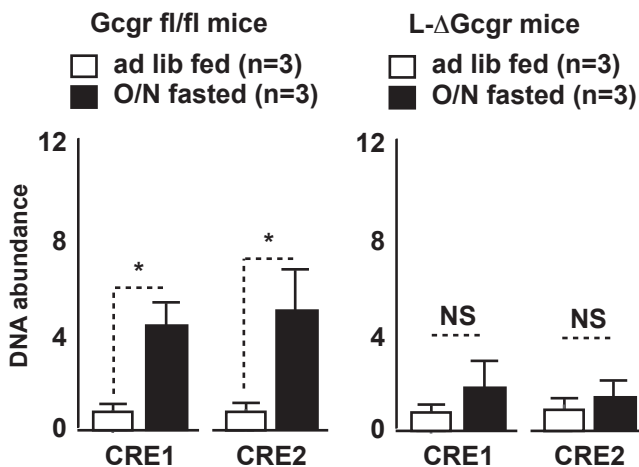

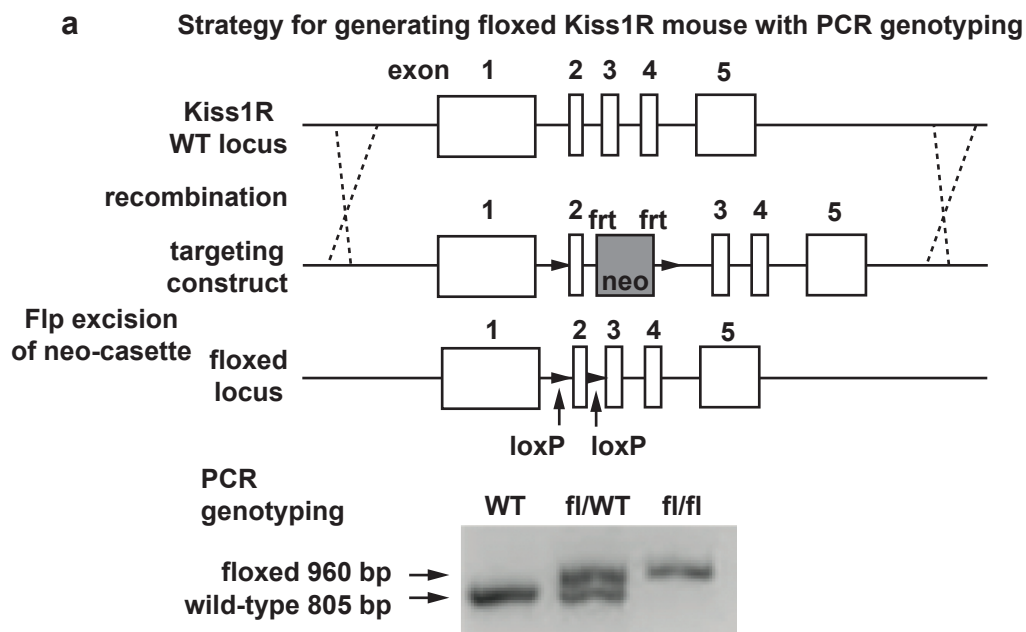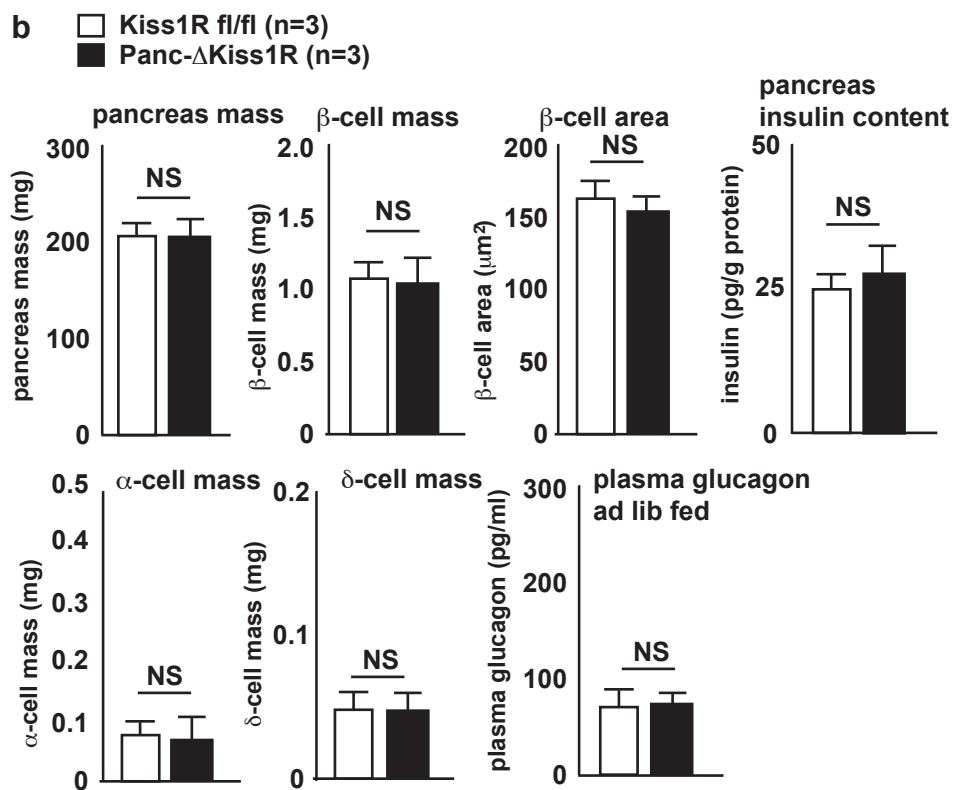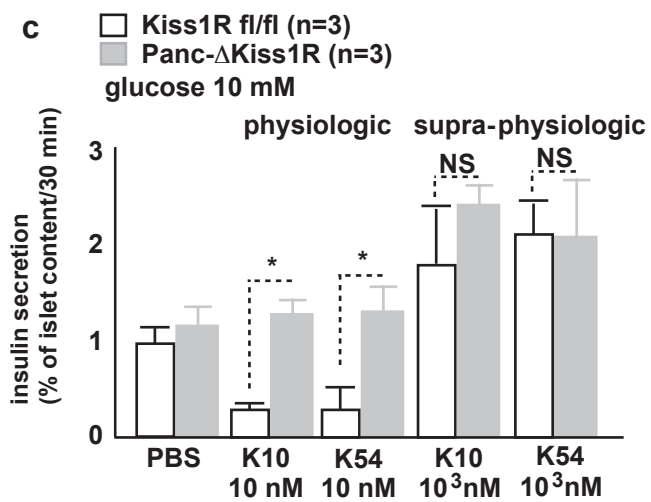

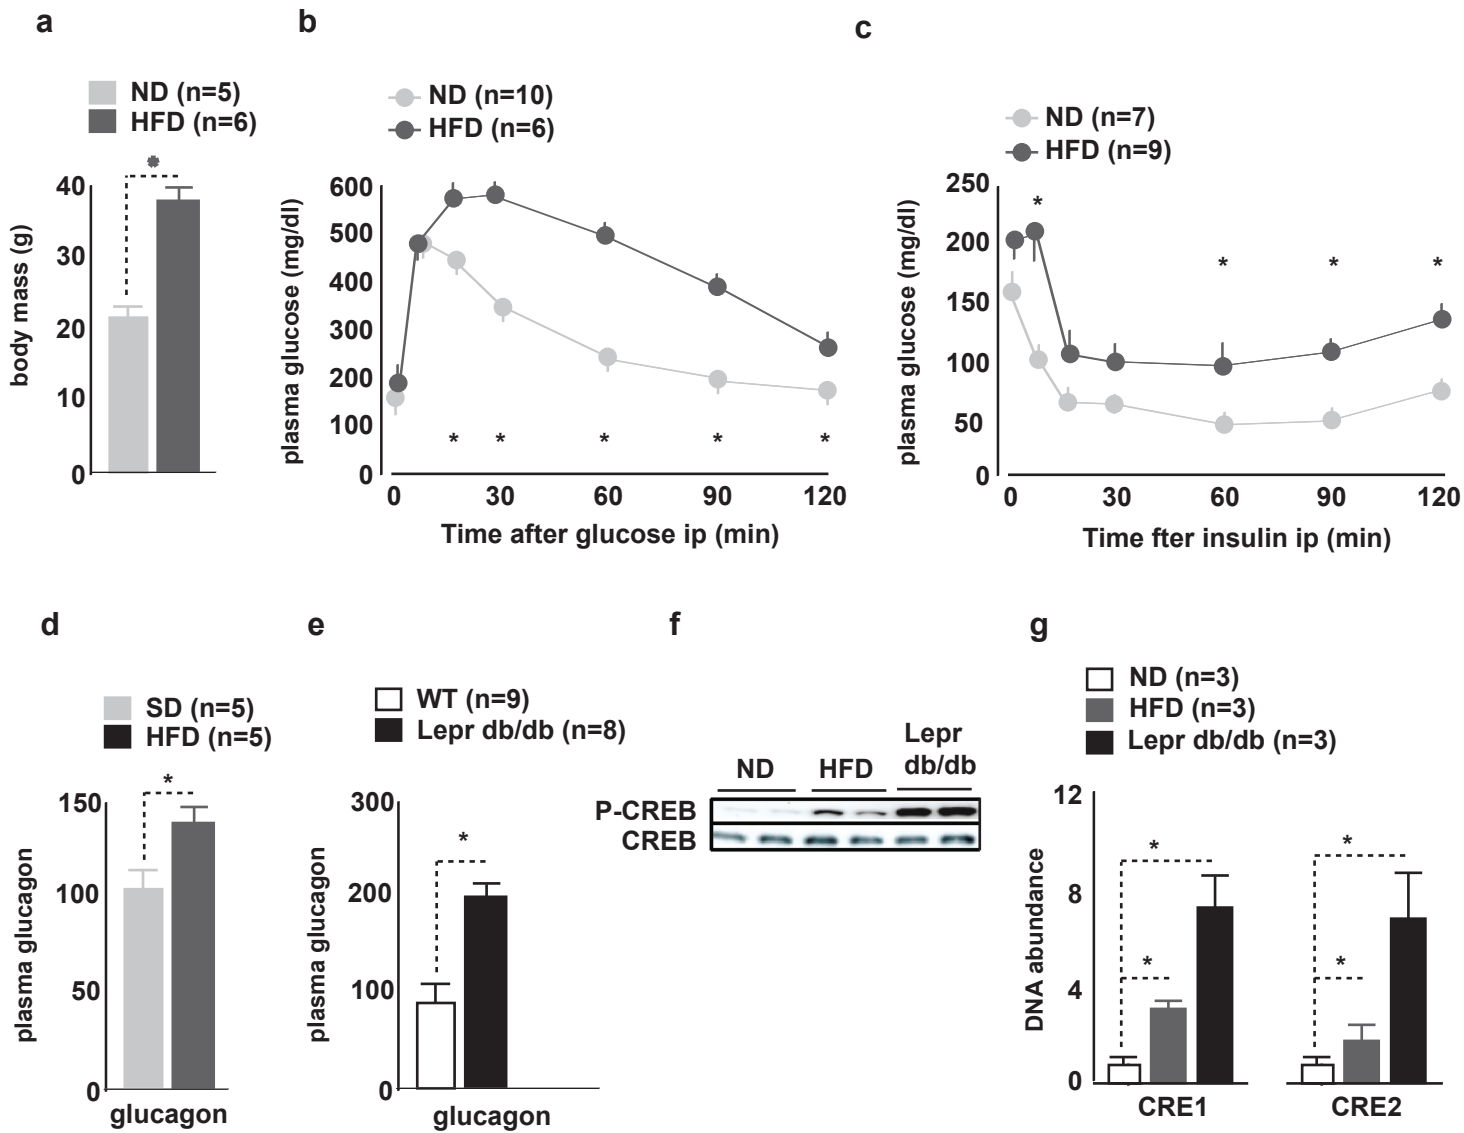

HFD fed mice

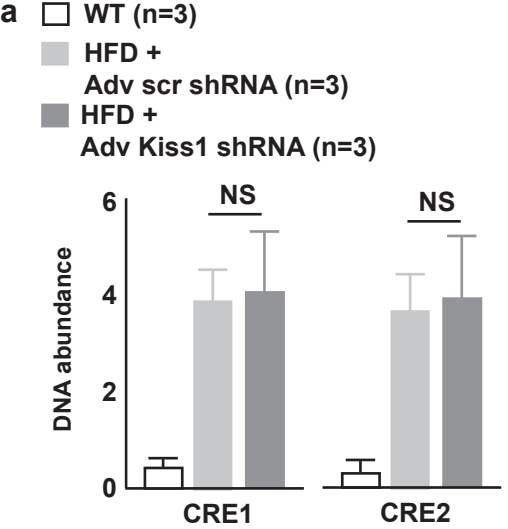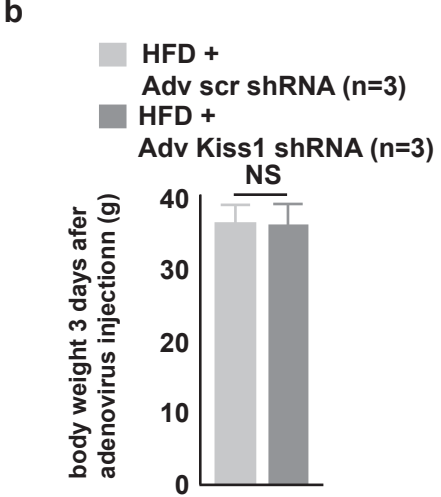

Lepr db/db mice

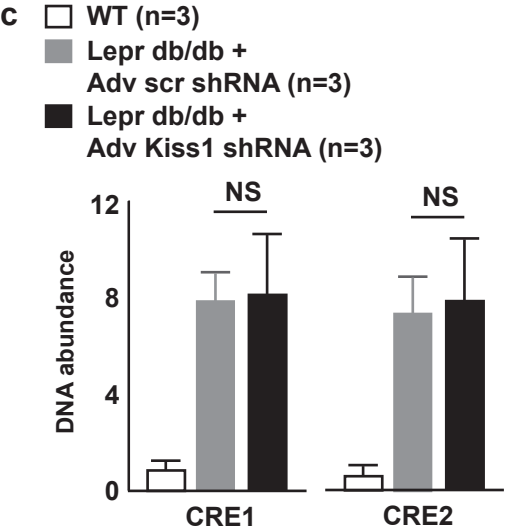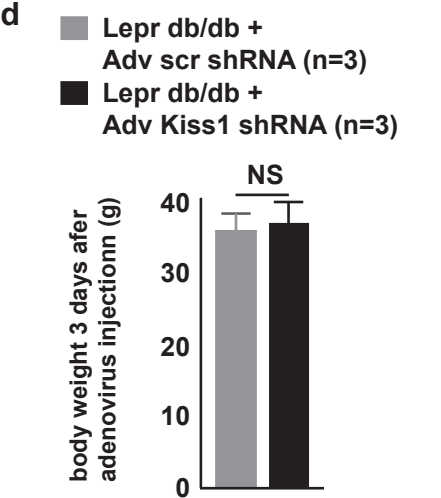

○ Kiss1R fl/fl + HFD (n=3)  
● Panc-ΔKiss1R + HFD (n=3)

□ Kiss1R fl/fl + HFD (n=3)  
■ Panc-ΔKiss1R + HFD (n=3)

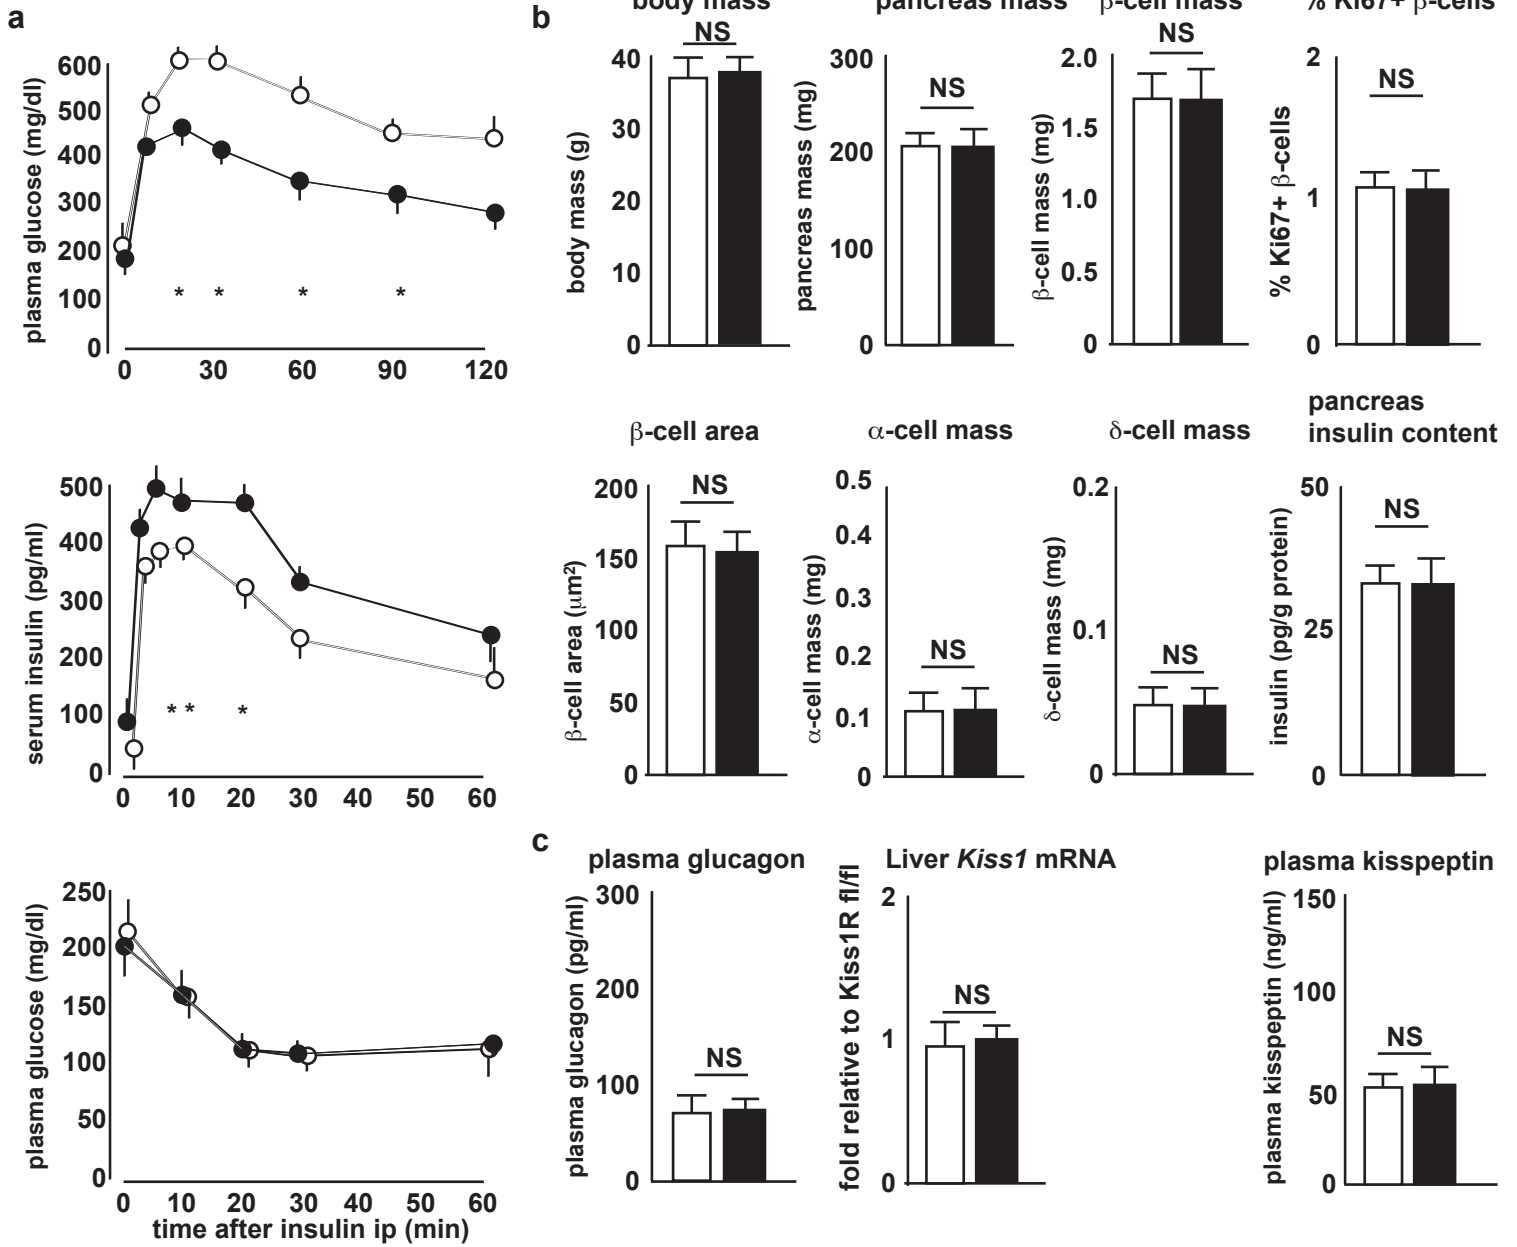

## Supplemental Figure Legends

### Figure S1, related to Figure 1

**Pancreas morphometric parameters and plasma glucagon levels are similar in *prkar1a<sup>fl/fl</sup>* and saline-infused as well as in L- $\Delta$ *prkar1a* and D-glucose infused mice (A-G)**

#### **Panels show**

**A** Representative IB of *prkar1a* in islets, hypothalamus, adipose tissue and skeletal muscle in *prkar1a<sup>fl/fl</sup>* and L- $\Delta$ *prkar1a*. Actin IB is shown for protein loading control, **B** Pancreas mass, **C**  $\beta$ -cell mass, **D** individual  $\beta$ -cell area, **E** Percent Ki67 positive  $\beta$ -cells, **F** plasma glucagon levels, **G**  $\alpha$ -cell mass, and **H**  $\delta$ -cell mass, respectively in *prkar1a<sup>fl/fl</sup>* and saline-infused as well as in L- $\Delta$ *prkar1a* and D-glucose infused mice.

**A:** Adv-CRE treatment does affect *prkar1a* expression outside of the liver (see also **Fig. 1A**)

#### **B-G:**

$\beta$ -cell proliferation is increased in L- $\Delta$ *prkar1a* 4 days after receiving Adv-CRE treatment as compared to *prkar1a<sup>fl/fl</sup>* mice; and  $\beta$ -cell proliferation is similarly increased in mice receiving 4 days of D-glucose infusions as compared to saline-infused mice. All other parameters are similar in all groups of mice (mean $\pm$ SEM, \* $p$ <0.05)

### **Insulin treatment in L- $\Delta$ *prkar1a* mice downregulates liver kisspeptin1 expression (I-K)**

**I** Plasma glucose levels 60 min after insulin treatment (1 IU/kg ip) in L- $\Delta$ *prkar1a* mice. L- $\Delta$ *prkar1a* mice repond to a large dose of insulin with reduction in plasma glucose at 60 min after insulin treatment (mean $\pm$ SEM, \* $p$ <0.05).

**J** qRT-PCR of *Kiss1* in liver tissue of *prkar1a<sup>fl/fl</sup>* mice and in L- $\Delta$ *Prkar1a* mice 60 min after treatment with vehicle (PBS) or insulin (1 IU/kg ip). *Kiss1* expression is upregulated in L- $\Delta$ *Prkar1a* as compared to *prkar1a<sup>fl/fl</sup>* mice. Insulin treatment donwregulates *Kiss1* expression in L- $\Delta$ *Prkar1a* (mean $\pm$ SEM, \* $p$ <0.05).

**K** Representative liver IB of kisspeptin (**top**) of *prkar1a<sup>fl/fl</sup>* and L- $\Delta$ *Prkar1a* mice in the fed state; (**bottom**) of *prkar1a<sup>fl/fl</sup>* mice and of L- $\Delta$ *Prkar1a* mice 60 min after treatment with vehicle (PBS) or insulin (1 IU/kg ip). L- $\Delta$ *Prkar1a* mouse livers exhibit elevated kisspeptin immunoreactivity, which is downregulated by insulin treatment.



## Figure S2 related to Figure 2

### Glucagon stimulates liver *Kiss1* expression via cAMP-PKA-CREB signaling

**A (left)** Schematic of luciferase reporter construct containing 1 kb of the murine *Kiss1* promoter with mutations in CRE1, CRE2 or both CRE1 and 2 half sites. **(right)** Relative light units indicating luciferase activity after transient transfection into H2.35 hepatoma cells of *Kiss1* promoter-luciferase reporter constructs followed by treatment with forskolin (fsk) and IBMX (100  $\mu$ M each). Both CRE1 and CRE2 within the *Kiss1* promoter functionally respond to fsk/IBMX treatment. Mutation of both CRE1 and 2 abolishes response of *Kiss1* promoter to fsk/IBMX stimulation (mean $\pm$ SEM, \* p<0.05).

**B** Transient co-transfection in H2.35 hepatoma cells of *Kiss1* promoter – luciferase reporter together with either empty pcDNA vector or constitutive active CREB Y134F. Both CRE1 and CRE2 within the *Kiss1* promoter respond to activation by CREB Y134F. Mutation of both CRE1 and 2 abolishes response of *Kiss1* promoter to CREB Y134F activation. (mean $\pm$ SEM, \* p<0.05).

**C** Transient co-transfection in H2.35 hepatoma cells of *Kiss1* promoter – luciferase reporter together with either empty pcDNA vector or dominant negative A-CREB. Stimulation with fsk/IBMX (100  $\mu$ M each) of the *Kiss1* promoter luciferase reporter is abolished by co-transfection of A-CREB (mean $\pm$ SEM, \* p<0.05).

**D** Chromatin immunoprecipitation followed by qPCR to detect *in vivo* CREB occupancy on CRE1 and CRE2 half-sites within the *Kiss1* promoter in liver samples of WT mice using control and CREB-specific antiserum. CREB occupies both CRE1 and CRE2 within the *Kiss1* promoter (mean $\pm$ SEM, \* p<0.05).

**E** Plasma glucagon levels in WT mice with unrestricted access to chow (ad lib fed), after an overnight fast (O/N fasted) and after regaining unrestricted access for 4 hours following an O/N fast. Plasma glucagon levels are elevated after O/N fasting and are reduced after 4 hours of refeeding (mean $\pm$ SEM, \* p<0.05).

**F** Representative IB in islet, hypothalamus, adipose tissue and skeletal muscle in *Insr* fl/fl and L- $\Delta$ *Insr* mice. Adv-CRE treatment does not ablate *Insr* in these tissues (see also **Fig. 2M**). Actin IB is shown for protein loading control.

**G** Plasma kisspeptin concentrations in *Gcgr*<sup>fl/fl</sup> and L- $\Delta$ *Gcgr* mice after ip treatment with PBS or glucagon. Glucagon does not stimulate plasma kisspeptin in L- $\Delta$ *Gcgr* mice (mean $\pm$ SEM, \* p<0.05).

**H** Plasma kisspeptin concentrations in *Gcgr*<sup>fl/fl</sup> and L- $\Delta$ *Gcgr* mice in fed and fasted states. Fasting does not stimulate plasma kisspeptin in L- $\Delta$ *Gcgr* mice (mean $\pm$ SEM, \* p<0.05).

I Plasma kisspeptin concentrations in *Insr<sup>fl/fl</sup>* and L-ΔInsr mice after ip treatment with PBS or glucagon. L-ΔInsr mice show a pronounced stimulation by glucagon in plasma kisspeptin (mean±SEM, \* p<0.05).

## Figure S3, related to Figures 3 and 2

### Generation of $Gcgr^{fl/fl}$ mice using homologous recombination technology.

**Selective adenovirus-CRE recombinase mediated liver ablation of  $Gcgr$  results in improved glucose tolerance, reduced liver CREB phosphorylation in response to glucagon treatment or overnight fasting and defective increase in CREB occupancy on the *Kiss1* promoter CREB response elements (CRE) 1 and 2**

**A (top)** Schematic depicting  $Gcgr$  WT locus, the targeting construct used for homologous recombination, the resulting floxed locus and **(bottom)** PCR genotyping for WT and floxed alleles. LoxP sites were inserted flanking exons 2 through 10. PCR genotyping differentiates WT and floxed alleles.

**B** Representative IB for glucagon receptor (GCGR) in  $Gcgr^{fl/fl}$  mice three days after treatment with Adv-GFP or Adv-CRE to ablate liver glucagon receptor expression (L- $\Delta Gcgr$  mice). GCGR is efficiently ablated *in vivo* in liver tissue of L- $\Delta Gcgr$  mice while GCGR remains detectable in control  $Gcgr^{fl/fl}$  mice. Adv-CRE treatment does not ablate GCGR in islets, hypothalamus, adipose tissue. Actin IB is shown for loading control.

**C** Plasma glucose levels during **(top)** ip GTT and **(bottom)** during ip ITT in  $Gcgr^{fl/fl}$  and L- $\Delta Gcgr$  mice. L- $\Delta Gcgr$  mice exhibit improved glucose tolerance and similar insulin tolerance as compared to  $Gcgr^{fl/fl}$  mice (mean $\pm$ SEM).

**D (top)** Representative liver IB showing pCREB and total CREB in liver 60 minutes after glucagon (100  $\mu$ g/kg ip) treatment in  $Gcgr$  and L- $\Delta Gcgr$  mice. CREB phosphorylation is stimulated in  $Gcgr^{fl/fl}$  control mice, but is significantly reduced in mice lacking liver glucagon receptor (L- $\Delta Gcgr$  mice); **(bottom)** Chromatin immunoprecipitation followed by qPCR to detect *in vivo* CREB occupancy on CRE1 and CRE2 half-sites within the *Kiss1* promoter in liver 60 minutes after glucagon (100  $\mu$ g/kg ip) treatment in  $Gcgr$  and L- $\Delta Gcgr$  mice. CREB occupancy of CRE1 and CRE2 of the *Kiss1* promoter increases after glucagon treatment in  $Gcgr^{fl/fl}$  but not in L- $\Delta Gcgr$  mice (mean $\pm$ SEM, \*  $p < 0.05$ ).

**E (top)** Representative liver IB extracts showing pCREB and total CREB in liver of  $Gcgr^{fl/fl}$  and L- $\Delta Gcgr$  mice with unrestricted access to chow (ad lib fed) or after an overnight fast (O/N fasted). CREB phosphorylation is stimulated in  $Gcgr^{fl/fl}$  control mice, but is significantly reduced in mice lacking liver glucagon receptor (L- $\Delta Gcgr$  mice); **(bottom)** Chromatin immunoprecipitation followed by qPCR to detect *in vivo* CREB occupancy on CRE1 and CRE2 half-sites within the *Kiss1* promoter in liver of  $Gcgr^{fl/fl}$  and L- $\Delta Gcgr$  mice with unrestricted access to chow (ad lib fed) or after an overnight fast (O/N fasted). CREB occupancy of CRE1 and CRE2 of the *Kiss1* promoter increases after an overnight fast in  $Gcgr^{fl/fl}$  but not in L- $\Delta Gcgr$  mice (mean $\pm$ SEM, \*  $p < 0.05$ ).

## Figure S4, related to Figure 4

**Generation of *Kiss1R<sup>fl/fl</sup>* mice using homologous recombination technology. Pancreas *Kiss1R* ablation does not affect pancreas morphometric parameters. Kisspeptin at nanomolar concentrations suppresses glucose stimulated insulin secretion from cultured islets in a *Kiss1R*-dependent manner**

**A (top)** Schematic depicting *Kiss1R* WT locus, the targeting construct used for homologous recombination, the resulting floxed locus and **(bottom)** PCR genotyping for WT and floxed alleles. LoxP sites were inserted flanking exon 2. PCR genotyping differentiates WT and floxed alleles.

### **B Panels show**

Pancreas mass,  $\beta$ -cell mass, individual  $\beta$ -cell area, pancreas insulin content,  $\alpha$ -cell mass,  $\delta$ -cell mass, and plasma glucagon levels in the fed state, respectively in *Kiss1R<sup>fl/fl</sup>* and in *Panc- $\Delta$ Kiss1R* mice. *Kiss1R<sup>fl/fl</sup>* and *Panc- $\Delta$ Kiss1R* do not differ in pancreas morphometric parameters, insulin content or plasma glucagon levels (mean $\pm$ SEM).

**C** Glucose-stimulated insulin secretion during static incubation in 10 mM glucose of islets from *Kiss1R<sup>fl/fl</sup>* and *Panc- $\Delta$ Kiss1R* mice in response to vehicle (PBS) and to physiologic (10 nM) and supraphysiologic ( $10^3$  nM) kisspeptin 10 (K10) concentrations (mean $\pm$ SEM, \*  $p < 0.05$ ). Physiologic K10 concentrations inhibit GSIS from *Kiss1R<sup>fl/fl</sup>* and *Panc- $\Delta$ Kiss1R* islets are resistant to K10 mediated GSIS suppression. At unusually high supraphysiologic K10 concentrations K10 stimulates GSIS in a *Kiss1R*-independent manner in both *Kiss1R<sup>fl/fl</sup>* and *Panc- $\Delta$ Kiss1R* islets.

## Figure S5, related to Figure 5

**High fat diet fed mice and *Lep<sup>db/db</sup>* mice exhibit increased plasma glucagon levels, increased liver CREB phosphorylation and *in vivo* liver CREB occupancy of CRE1 and 2 within the *Kiss1* promoter.**

**A** Body mass of male littermate mice after receiving for 8 weeks standard diet (SD) and high fat diet (HFD). HFD causes an increase in body weight (mean $\pm$ SEM, \* p<0.05).

**B** Plasma glucose levels during **(left)** ip GTT and **(right)** during ip ITT in male mice after receiving for 8 weeks standard diet (SD) and high fat diet (HFD). HFD fed mice exhibit impaired glucose tolerance as well as reduced insulin tolerance (mean $\pm$ SEM, \* p<0.05).

**C** Plasma glucagon levels in the fed state in male mice after receiving for 8 weeks standard diet (SD) and high fat diet (HFD). HFD fed mice exhibit elevated plasma glucagon levels as compared to mice kept on SD (mean $\pm$ SEM, \* p<0.05)

**D** Plasma glucagon levels in the fed state in 3-4 week old male WT mice and in age-matched male db/db mice. *Lep<sup>db/db</sup>* mice exhibit elevated plasma glucagon levels as compared to WT mice (mean $\pm$ SEM, \* p<0.05).

**E** Representative liver of pCREB and total CREB of WT mice kept on SD, in mice receiving 8 weeks of HFD and 3-4 week old male *Lep<sup>db/db</sup>* mice. HFD fed mice and *Lep<sup>db/db</sup>* mice show increased pCREB. Db/db mice show higher CREB phosphorylation status than HFD fed mice (mean $\pm$ SEM).

**F** Chromatin immunoprecipitation followed by qPCR to detect *in vivo* CREB occupancy on CRE1 and CRE2 half-sites within the *Kiss1* promoter in liver samples of WT mice kept on SD, in mice receiving 8 weeks of HFD and 3-4 week old male *Lep<sup>db/db</sup>* mice. HFD fed and *Lep<sup>db/db</sup>* mice show increased CREB occupancy of both CRE1 and 2 half-sites within the *Kiss1* promoter (mean $\pm$ SEM, \* p<0.05).

## Figure S6, related to Figure 6

**In HFD fed and *Lepr<sup>db/db</sup>* mice shRNA-mediated *Kiss1* knockdown does not alter *in vivo* CREB occupancy of CRE1 and 2 half-sites in *Kiss1* promoter. shRNA-mediated *Kiss1* knockdown as compared to scrambled shRNA treatment does not change body weight in HFD fed mice or *Lepr<sup>db/db</sup>* mice.**

### HFD fed mice

**A** Chromatin immunoprecipitation followed by qPCR to detect *in vivo* CREB occupancy on CRE1 and CRE2 half-sites within the *Kiss1* promoter in liver samples from control mice kept on a standard diet (SD) and mice kept for 8 weeks on a HFD before treatment with Adv Kiss1–shRNA or control adenovirus scr-shRNA. Liver tissue was collected 3 days after adenovirus treatment. CREB occupancy on Kiss1 CRE half sites 1 and 2 in HFD fed mouse liver is increased as compared to liver from SD fed mice. Adenovirus mediated Kiss1 knockdown in HFD fed mice does not affect CREB occupancy of CRE 1 and 2 half-sites in the Kiss1 promoter (mean±SEM, \* p<0.05).

**B** Body weight in HFD fed mice 3 days after treatment with Adv-scr shRNA or Adv-Kiss1 shRNA. Body weight is similar in HFD fed mice and unaffected by Adv treatment (mean±SEM).

### *Lepr db/db* mice

**C** Chromatin immunoprecipitation followed by qPCR to detect *in vivo* CREB occupancy on CRE1 and CRE2 half-sites within the *Kiss1* promoter in liver samples from control WT and 4-5 week old *Lepr<sup>db/db</sup>* mice before treatment with Adv Kiss1–shRNA or control adenovirus scr-shRNA. Liver tissue was collected 3 days after adenovirus treatment. CREB occupancy on Kiss1 CRE half sites 1 and 2 in *Lepr<sup>db/db</sup>* mouse liver is increased as compared to liver from WT mice. Adenovirus mediated Kiss1 knockdown in *Lepr<sup>db/db</sup>* mice does not affect CREB occupancy of CRE 1 and 2 half-sites in the Kiss1 promoter (mean±SEM, \* p<0.05).

**D** Body weight in 4-5 week old *Lepr db/db* mice 3 days after treatment with Adv-scr shRNA or Adv-Kiss1 shRNA. Body weight is similar in *L-Δprkar1a* mice and unaffected by Adv treatment (mean±SEM).

## Figure S7, related to Figure 7

### High fat diet fed mice lacking pancreas Kiss1R have improved glucose tolerance owing to increased glucose stimulated insulin secretion

**A (top)** plasma glucose, **(middle)** serum insulin during ip GTT and **(bottom)** plasma glucose during ipITT in 14 week old male *Kiss1R<sup>fl/fl</sup>* mice and Panc- $\Delta$ Kiss1R mice after receiving 8 weeks of HFD. Panc- $\Delta$ Kiss1R mice have improved glucose tolerance as compared to *Kiss1R<sup>fl/fl</sup>* counterparts. Insulin resistance as reflected by similar ITT is similar in *Kiss1R<sup>fl/fl</sup>* and Panc- $\Delta$ Kiss1R mice (mean $\pm$ SEM).

**B** Pancreas morphometry in 14 week old male *Kiss1R<sup>fl/fl</sup>* mice and Panc- $\Delta$ Kiss1R mice receiving after 8 weeks of HFD. Body mass, pancreas mass,  $\beta$ -cell mass and -size, % Ki67 positive  $\beta$ -cell reflecting  $\beta$ -cell proliferation activity,  $\alpha$ -cell mass,  $\delta$ -cell mass and pancreas insulin content are similar in *Kiss1R<sup>fl/fl</sup>* mice and Panc- $\Delta$ Kiss1R mice (mean $\pm$ SEM).

**C** Plasma glucagon, liver *Kiss1* mRNA levels and plasma kisspeptin levels are similar in 14 week old male *Kiss1R<sup>fl/fl</sup>* mice and Panc- $\Delta$ Kiss1R mice receiving after 8 weeks of HFD (mean $\pm$ SEM, \*  $p < 0.05$ )

## Experimental procedures.

### Animals

**Generation of *Gcgr*<sup>fl/fl</sup> and *Kiss1R*<sup>fl/fl</sup> mice.** *Gcgr*<sup>fl/fl</sup> were generated together with Ingenious Targeting Laboratories. A targeting construct for mouse *Gcgr* was generated by bacterial recombineering with a loxP sequence inserted upstream of the second exon. A second loxP containing cassette including neomycin resistance separately flanked by FLPe (FRT) recognition sequences (Rodriguez et al., 2000) inserted downstream of exon 10. Location of LoxP sites predicted after CRE-mediated recombination lack of any protein product to be generated (**Fig. S3**). To generate *Kiss1R*<sup>fl/fl</sup> mice, a targeting construct was created as described (Na et al., 2013) and contained a loxP site upstream of the second exon and one loxP containing cassette including neomycin resistance separately flanked by FLPe (FRT) recognition sequences 3' of the second exon. Location of LoxP sites predicted after CRE-mediated recombination lack of the second transmembrane domain of *Kiss1R* (**Fig. S4**). The reproductive deficiency of gonadotrope-specific CRE-mediated *Kiss1R* ablation in *Kiss1R*<sup>fl/fl</sup> mice has been separately reported (Novaira et al., 2013). Homologous recombination of targeting constructs in embryonic stem cells was achieved as described (Mortensen, 2006). Proper insertion was ascertained by PCR screening as well as Southern blot. Chimerae were generated after C57Bl/6 blastocyst injection and embryonic propagation in pseudo-pregnant females. Germline transmission was confirmed by PCR genotyping tail DNA extracts. The first offspring was interbred with Actin-FLPe deleter mice (Jackson Laboratories) (Rodriguez et al., 2000) to eliminate the neomycin cassette. Both *Gcgr*<sup>fl/fl</sup> and *Kiss1R*<sup>fl/fl</sup> mice were viable, fertile, transmitted the modified gene in Mendelian pattern and showed no obvious defects in body weight or metabolism. Mice were backcrossed at least 6 times into C57Bl/6 background. Primers used for genotyping mice are provided below.



## Primers used for PCR genotyping mice

|               |    |                                               |
|---------------|----|-----------------------------------------------|
| Prkar1a fl/fl | FW | GCA GGC GAG CTA TTA GTT TA                    |
|               | RV | CAT CCA TCT CCT ATC CCC TTT                   |
| Kiss1R fl/fl  | FW | TTC GTG AAC TAC ATC CAG CAG                   |
|               | RV | AGA GTG GCA CAT GTG GCT TG                    |
| Gcgr fl/fl    | FW | TCA CCC GTG ATG ATC CCA TGT CTT               |
|               | RV | AGT GGC TCA CAG TGC CTA TTC AGA               |
| Insr fl/fl    | FW | GAT GTG CAC CCC ATG TCT G                     |
|               | RV | CTG AAT AGC TGA GAC CAC AG                    |
| Lepr db/db    | FW | AGA ACG GAC ACT CTT TGA AGT CTC               |
|               | RV | CAT TCA AAC CAT AGT TTA GGT TTG T             |
|               |    | restriction enzyme digestion (RsaI) after PCR |

To generate HFD fed glucose intolerant animals, 6-week old C57Bl/6J male mice were fed for 8 weeks a diet containing 60% calories as lipids (Bioserv). Controls were male littermates fed regular diet in parallel.

For overnight fasting, animals were restricted access to food overnight from 6pm until 9 am (=O/N fasted). A subset of mice was refed by allowing unrestricted access to food after overnight fasting for 4 hours before analysis (refed). Mice without any restriction to food (=ad lib fed) were allowed unrestricted access to food at all times.

Intraperitoneal glucose tolerance (ipGTT) and insulin tolerance (ipITT) tests were performed according to standard protocols (Song et al., 2013; Song et al., 2011). After 9 am – 3 pm fasting, animals were administered 20% D-glucose (via ip injection), insulin 0.5 U/kg i.p. (Novolin), glucagon (100 µg/kg i.p. (Sigma)). K54 (Gly-Thr-Ser-Leu-Ser-Pro-Pro-Pro-Glu-Ser-Ser-Gly-Ser-Arg-Gln-Gln-Pro-Gly-Leu-Ser-Ala-Pro-His-Ser-Arg-Gln-Ile-Pro-Ala-Pro-Gln-Gly-Ala-Val-Leu-Val-Gln-Arg-Glu-Lys-Asp-Leu-Pro-Asn-Tyr-Asn-Trp-Asn-Ser-Phe-Gly-Leu-Arg-Phe-NH<sub>2</sub>, 10 nmol; Calbiochem), or K10 (Tyr-Asn-Trp-Asn-Ser-Phe-Gly-Leu-Arg-Phe-NH<sub>2</sub>, 10 nmol; Calbiochem) was administered simultaneously with glucose during ipGTT. The glucagon receptor antagonist GAI (N-(3-Cyano-6-(1,1-dimethylpropyl)-4,5,6,7-tetrahydro-1-benzothien-2-yl)-2-ethylbutanamide

(Qureshi et al., 2004) and its non-active analogue were administered (50 mg/kg i.p. in DMSO) in HFD fed and *Lep<sup>db/db</sup>* mice 60 min before i.p.GTT. Intraperitoneal pyruvate conversion (1g/kg i.p.) test (ipPCT) in  $\Delta$ L-Prkar1a mice was performed in the fed state (9 am) to avoid any confounding effects of fasting-induced elevated endogenous glucagon levels. Tail-vein blood was collected at the indicated times in figures for glucose and insulin measurements. Serum insulin was measured using mouse magnetic bead panel (Millipore, Luminex). Plasma for glucagon measurements was drawn from mice in the fed state at 9 am, unless otherwise noted for fasting studies. Plasma glucagon (Alpco) and kisspeptin1 (USCN Life Sciences Inc E92559Ra) were measured by ELISA according to manufacturers instructions including dilution of samples. Because kisspeptin1 ELISA detects K10 and does not differentiate between the various bioactive kisspeptin1 breakdown products, the plasma concentrations measured with ELISA are provided according to manufacturers' instructions and were not converted into SI units.

All animal studies were performed at least in triplicate. For studies involving standard (Taconic) and high fat diet (60% calories from saturated fat; Bioserv) care was taken to assign littermates to different diets and to perform tests in age matched animals. Animals were randomized to different treatments described herein. Replicates were obtained testing different individual animals and not by repeat testing the same animal. Animal tests and sample measurements (e.g. ELISA) from animal tests were performed in a blinded manner.

Adenovirus (Adv-CRE and Adv-GFP, University of Iowa Genetics Core) were injected into tail vein ( $10^9$  plaque forming units/mouse in 1xPBS). Adv-CRE injection into mice carrying a floxed stop codons upstream of YFP at the Rosa26 locus (Jackson Laboratories) showed 95% of hepatocytes are transduced with CRE recombinase. Occasional recombination was found in lung tissue but not in brain, heart, kidney, pancreas, islet, spleen, muscle confirming strong liver targeting by injected adenovirus (not shown). Immunoblots of islets, hypothalamus, adipose tissue, and skeletal muscle in L- $\Delta$ Prkar1a, L- $\Delta$ Gcgr, L- $\Delta$ Insr mice confirmed that, Prkar1a, Gcgr, and Insr were

expressed at unchanged levels relative to control (Adv-GFP treated counterparts) and that corresponding floxed genes had not been ablated in these tissues by Adv-CRE treatment.

### ***In vivo* cannulation and perfusion.**

For catheterization, mice were anesthetized with inhaled 2% isoflurane. Micro-renathane catheters (Braintree Scientific) were inserted in the left femoral artery and vein, sutured in place, stabilized with superglue (Henkel), tunneled subcutaneously to the upper back by threading through a blunt needle, taped to a wire attached to posterior cervical muscles for stiffness (A-M-Systems), and connected to a 360° dual channel swivel designed for mice (Instech, Plymouth Meeting). Mice received infusions of 0.9% sodium chloride or 50% dextrose. Detailed protocols are provided in reference (Alonso et al., 2007).

### **Immunohistochemistry and pancreas morphometrical analysis.**

At least 3 Bouin's-fixed and paraffin embedded pancreas sections/mouse 150  $\mu$ M apart were immuno-stained and analyzed for islet/ $\beta$ -,  $\alpha$ - and  $\delta$ -cell mass as described (Song et al., 2011). Confocal imaging was performed on a fluorescence microscope (Zeiss) equipped with confocal and digital image capturing capabilities.

### **Gene expression analysis.**

Microarray expression profiles were generated using the Illumina MouseRef-8 v2 BeadChips (Illumina, San Diego, CA) by the Genome Sciences Laboratory at the University of Virginia. Biotin-labeled cRNA was synthesized by the total prep RNA amplification kit from Ambion (Austin, TX). cRNA was quantified and normalized to 150 ng/ $\mu$ l, and then 750 ng was hybridized to each BeadChip. The image data was then acquired by scanning the chips on an Illumina iScan. The raw idat files were uploaded into the Illumina Genomestudio software and the data exported for analysis. Sample and control probe signal intensities were exported from GenomeStudio. These files were imported into R version 2.15.0, quantile normalized, and log<sub>2</sub> transformed using the Bioconductor beadarray package, version 2.6.0, and Illumina probe IDs were

annotated using the Bioconductor illuminaMousev2.db package, version 1.16.0. The BioConductor array QualityMetrics package, version 3.12.0 was used to perform quality assessment. For examining differential gene expression, a linear model was with empirical-Bayes moderated standard errors using the limma package, version 3.14.11. Gene-set enrichment analysis (GSEA) was used to examine differential expression results for enriched pathways (Smyth, 2004; Subramanian et al., 2005). SignalP 4.0 was used with the default parameters to determine which differentially expressed genes contained a cellular export signal based on the amino acid sequence (Petersen et al., 2011). A cut-off for False discovery rate-corrected  $P < 0.05$  and  $\log_2$  Fold Change (FC)  $\geq 2$  was used to identify a significant change in gene expression. Array results of interest were validated by quantitative RT-PCR (qRT-PCR).

### **RT-PCR**

RNA was isolated using Illustra RNAspin combined with removal of DNA by DNaseI digestion (GE Healthcare). QPCR was carried out following standard procedures using SYBR green (BioRad) using mouse primers indicated in Supplemental Table1. Expression levels were calculated using the  $2^{-\Delta\Delta CT}$  method with 18S rRNA as internal control (Livak and Schmittgen, 2001). PCR primers are provided below.

### **Primers used for quantitative PCR**

|        |         |                         |
|--------|---------|-------------------------|
| Kiss1  | Kiss1 F | GCATACCGCGATTCTTTTT     |
|        | Kiss1 R | AGCTGCTGCTTCTCCTCTGT    |
| Gcgr   | GCGR F  | TGCTGTTTGTCATCCCCTG     |
|        | GCGR R  | CAGGAAGACAGGAATACGCAG   |
| Kiss1R | Gpr54 F | GCAAATTCGTCAACTACATCCAG |
|        | Gpr54 R | GGGAACACAGTCACATACCAG   |
| 18sRNA | 18S-F   | GCAATTATTCCCCATGAACG    |
|        | 18S-R   | GGCCTCACTAAACCATCCAA    |
| Actin  | Act F   | AGCCATGTACGTAGCCATCC    |
|        | ActR    | CTCTCAGCTGTGGTGGTGAA    |

|          |                  |                                                  |
|----------|------------------|--------------------------------------------------|
| Ppargc1a | Pgc1 F<br>Pgc1 R | CAGCCTCTTTGCCCAGATCT<br>CCGCTAGCAAGTTTGCCTCA     |
| Src1     | Src1 F<br>Src1 R | AGGAGTGATAGAGAAGGAGTCG<br>TGATTGTAACCCAAGTAGCTGG |
| Pck1     | Pck1 F<br>Pck1 R | CTGCATAACGGTCTGGACTTC<br>CAGCAACTGCCCGTACTCC     |
| G6P      | G6p F<br>G6p R   | CGACTCGCTATCTCCAAGTGA<br>GTTGAACCAGTCTCCGACCA    |

For ChIP assay

|               |                    |                                           |
|---------------|--------------------|-------------------------------------------|
| Kiss1pr CRE 1 | KCRE1 F<br>KCRE1 R | TGTCGTCTTTGGCTTCCT<br>TGCACCTAGGGTAGCAC   |
| Kiss1pr CRE2  | KCRE2 F<br>KCRE2 R | AGGCGAGTGCCTTGAAC<br>CCACTTTCTTCTGGACTTGA |

### Islet studies

Islet isolation was performed by collagenase digestion, gradient centrifugation and three rounds of microscope-assisted manual picking of islets (Song et al., 2011). Static incubation studies were conducted as previously described with 20 hand-picked equal-sized islets were studied in each group. Islets were cultured in RPMI 1640 medium (Invitrogen) containing 10 or 20 mM D-glucose (as indicated) and supplemented with 0.2% bovine serum albumin, 1% each Na-Pyruvate, HEPES, Penicillin/Streptomycin. After 30 min incubation glucose concentrations, supernatant was taken for insulin measurements and pelleted islets were taken in acid ethanol (0.18M HCl in 70% ethanol) for insulin measurements in islets (Alpco). Islet protein concentration was measured using the BCA method (Thermo Fisher).

Insulin secretion during static incubation. After overnight culture (37 C, 5% CO<sub>2</sub>, 95% O<sub>2</sub> in humid chamber) of isolated islets in RPMI 1640 (Mediatech) containing 5 mM glucose, 1% each Na-Pyruvate, HEPES, Penicillin/Streptomycin and 0.2% bovine serum albumin (BSA), islets were switched to either 10 or 20 mM glucose containing

RPMI 1640. Where indicated, Kisspeptin-10 (0-100 nM, and 1  $\mu$ M), E4 (10 nM) or vehicle (PBS) was added. After 30 min incubation glucose concentrations, supernatant was taken for insulin measurements and pelleted islets were taken in acid ethanol (0.18M HCl in 70% ethanol) for insulin measurements in islets (ELISA, AlpcO). Islet protein concentration was measured using the BCA method (Thermo Fisher).

Dose response curves of GSIS inhibition by Kisspeptin-54 or -10 (0-100 nM) to serve as a functional bioassay for plasma kisspeptin1 activity performed at 6 separate times provided intra-assay and inter-assay coefficient of variations of 7.3% and 9.2%, respectively.

For studies with plasma incubation, a final concentration of plasma was 1% or 10% (vol/vol). Plasma was treated with a protease inhibitor cocktail containing 4-(2-Aminoethyl) benzenesulfonyl fluoride hydrochloride (1mM), Aprotinin (0.8  $\mu$  M), bestatin (50  $\mu$ M), (1S,2S)-2-(((S)-1-((4-Guanidinobutyl)amino)-4-methyl-1-oxopentan-2-yl)carbamoyl)cyclopropanecarboxylic acid (15  $\mu$ M), EDTA (5  $\mu$ M), leupeptin (20  $\mu$ M), pepstatin A (10  $\mu$ M) (Liu et al., 2013) (Thermo-Fisher), K54, K10, E4 were added at the concentrations indicated in the relevant figures. Islets were taken in 0.18M HCL/ 70% ethanol to extract and measure total islet insulin content. cAMP concentrations were measured in islet extracts using ELISA (Enzo Life Sciences).

Perifusion studies were performed as previously published (Song et al., 2013; Song et al., 2011) with slight modifications. The perifusate was Krebs ringer buffer (KRB) (37 C, pH 7.4) containing 0.2% BSA fraction V, 24 mM sodium bicarbonate and was gassed with 95% air and 5% CO<sub>2</sub>. Perifusion (1ml/min) occurred for the first 30 minutes with a KRB containing 3 mM glucose for equilibration, after which time the perifusate was collected in 1 ml fractions. After additional 10 minutes, glucose in the perifusate was increased to 10 mM. Where indicated, K10 (10 nM) or E4 (10 nM) was added to the perifusate. Insulin was measured in selected individual eluent fractions at 30, 35, 40, 42, 45, 50, 55, 60 min (AlpcO ELISA). The first 10 minutes after increasing glucose was defined as first phase, the period thereafter was defined as second phase of insulin secretion. At the end of the perifusion protocol, 30mM KCL was administered into the perifusate to

depolarize  $\beta$ -cells. Insulin levels were normalized to total islet protein, which was spectrophotometrically determined (Eppendorf) after completion of the perfusion protocol.

### **Cell culture studies**

Mouse primary hepatocytes were isolated and cultured as described (He et al., 2009). H2.35 hepatoma cell line was cultured and transfected as described (He et al., 2009). 1kb of the 5' untranslated region of the mouse *Kiss1* gene were cloned by PCR into pGL4. The CRE half sites (TGCAT) within the promoter region were mutated by site directed mutagenesis to (TATGT). Luciferase activity was measured in cell lysates using a luminometer (Berthold) after treatment each for 2 hours with forskolin/IBMX (100  $\mu$ M each) or glucagon (200 pg/ml) or/and insulin (2000 pg/ml). Dominant-negative A-CREB (Ahn et al., 1998) and WT CREB were from Addgene. Constitutively active CREB Y134F (Du et al., 2000) was generated by site directed mutagenesis of WT CREB.

## Protein Immunoblots

Immunoblots (IB) were performed with 40-50  $\mu$ g protein taken in lysis buffer (Cell Signaling). Representative blots are shown. Actin IB of corresponding samples are shown for protein loading references. Chromatin immunoprecipitation studies were performed as described (Song et al., 2011). Antibodies used are listed below.

### Primary antibodies used for immunoblots and immunohistochemistry.

| Antibody                             | Vendor                             | Cat. No.       | Fold Dilution |
|--------------------------------------|------------------------------------|----------------|---------------|
| Mouse anti-Actin                     | Millipore                          | MAB1501        | 4000          |
| Mouse anti-PKA[R1]                   | BD<br>Transduction<br>Laboratories | 610165         | 500           |
| Mouse anti-PKA[R1a]                  | BD<br>Transduction<br>Laboratories | 610609         | 250           |
| Mouse anti-PKA[R1Ia]                 | BD<br>Transduction<br>Laboratories | 612242         | 2000          |
| Mouse anti-PKA[R1IB]                 | BD<br>Transduction<br>Laboratories | 610625         | 2000          |
| Mouse anti-PKA[C]                    | BD<br>Transduction<br>Laboratories | 610980         | 2000          |
| Rabbit anti-CREB-1                   | Santa Cruz                         | sc-58          | 100           |
| Rabbit anti- Ser133-<br>Phospho CREB | Abcam                              | ab30651        | 500           |
| Rabbit anti Kisspeptin10             | Millipore                          | AB9754         | 400           |
| Rabbit anti-Kiss1R                   | Phoenix<br>Pharmaceuticals         | H-001-64       | 200           |
| Rabbit anti glucagon<br>receptor     | Novus biological                   | NBP1-<br>00850 | 400           |
| Mouse anti-insulin<br>receptor       | Abcam                              | ab69508        | 1000          |
| Guinea-pig anti-insulin              | DAKO                               | A0564          | 1000          |
| Rabbit anti-glucagon                 | Zymed                              | 18-0064        | 550           |
| Rabbit anti-somatostatin             | DAKO                               | A0566          | 200           |



## Human studies

Tests on de-identified human samples were approved by the Johns Hopkins University Institutional Review Board. Liver tissue from humans without diabetes mellitus and with T2DM were obtained from Origene and National Disease Research Interchange (NDRI). Serum samples from humans without and with T2DM were from NDRI. Samples from T2DM were from poorly controlled diabetics, not receiving insulin or metformin treatment. Details of samples are provided below.

## Human liver tissue and islet information

| Tissue        | Source              | Gender       | Age             | Diagnosis              | Treatment                | Cause of Death |
|---------------|---------------------|--------------|-----------------|------------------------|--------------------------|----------------|
| Liver         | NDRI<br>OD26532     | Female       | 65y             | T2DM x 2<br>weeks, HTN | none                     | CV stroke      |
| Liver         | NDRI<br>OD26278     | Male         | 94y             | T2DM x 31y             | glipizide,<br>lisinopril | Resp. failure  |
| Liver         | NDRI<br>OD2072      | Male         | 78y             | T2DM<br>untreated      | none                     | Cardiac arrest |
| Liver         | Origene<br>CP565754 | Not provided | Not<br>provided | Normal, no<br>T2DM     | none                     | Not provided   |
| Liver         | Origene<br>CP565527 | Not provided | Not<br>provided | Normal, no<br>T2DM     | none                     | Not provided   |
| Liver         | Origene<br>CP565735 | Not provided | Not<br>provided | no T2DM                | none                     | Not provided   |
|               |                     |              |                 |                        |                          |                |
| Islet protein | NDRI<br>OD18253     | Female       | 40y             | Normal, no<br>T2DM     | none                     | CV stroke      |
| Islet protein | NDRI<br>OD1860      | Male         | 65y             | Normal, no<br>T2DM     | none                     | CV stroke      |
| Islet protein | NDRI<br>OD40157     | Male         | 27y             | Normal, no<br>T2DM     | none                     | trauma         |

## References to Supplemental Information

- Ahn, S., Olive, M., Aggarwal, S., Krylov, D., Ginty, D.D., and Vinson, C. (1998). A dominant-negative inhibitor of CREB reveals that it is a general mediator of stimulus-dependent transcription of c-fos. *Mol Cell Biol* *18*, 967-977.
- Alonso, L.C., Yokoe, T., Zhang, P., Scott, D.K., Kim, S.K., O'Donnell, C.P., and Garcia-Ocana, A. (2007). Glucose infusion in mice: a new model to induce beta-cell replication. *Diabetes* *56*, 1792-1801.
- Du, K., Asahara, H., Jhala, U.S., Wagner, B.L., and Montminy, M. (2000). Characterization of a CREB gain-of-function mutant with constitutive transcriptional activity in vivo. *Mol Cell Biol* *20*, 4320-4327.
- He, L., Sabet, A., Djedjos, S., Miller, R., Sun, X., Hussain, M.A., Radovick, S., and Wondisford, F.E. (2009). Metformin and insulin suppress hepatic gluconeogenesis through phosphorylation of CREB binding protein. *Cell* *137*, 635-646.
- Liu, Z., Ren, C., Jones, W., Chen, P., Seminara, S.B., Chan, Y.M., Smith, N.F., Covey, J.M., Wang, J., and Chan, K.K. (2013). LC-MS/MS quantification of a neuropeptide fragment kisspeptin-10 (NSC 741805) and characterization of its decomposition product and pharmacokinetics in rats. *J Chromatogr B Analyt Technol Biomed Life Sci* *926*, 1-8.
- Livak, K.J., and Schmittgen, T.D. (2001). Analysis of relative gene expression data using real-time quantitative PCR and the 2<sup>(-Delta Delta C(T))</sup> Method. *Methods* *25*, 402-408.
- Mortensen, R. (2006). Overview of gene targeting by homologous recombination. *Curr Protoc Mol Biol Chapter 23*, Unit 23 21.
- Na, G., Wolfe, A., Ko, C., Youn, H., Lee, Y.M., Byun, S.J., Jeon, I., and Koo, Y. (2013). A low-copy-number plasmid for retrieval of toxic genes from BACs and generation of conditional targeting constructs. *Mol Biotechnol* *54*, 504-514.
- Novaira, H.J., Hoffman, G.E., Koo, Y., Wolfe, A.M., and Radovick, S. (2013). Reproductive abnormalities associated with deletion of Gpr54 in mouse GnRH neurons. *Endocrinology suppl*.
- Petersen, T.N., Brunak, S., von Heijne, G., and Nielsen, H. (2011). SignalP 4.0: discriminating signal peptides from transmembrane regions. *Nat Methods* *8*, 785-786.
- Qureshi, S.A., Rios Candelore, M., Xie, D., Yang, X., Tota, L.M., Ding, V.D., Li, Z., Bansal, A., Miller, C., Cohen, S.M., *et al.* (2004). A novel glucagon receptor antagonist inhibits glucagon-mediated biological effects. *Diabetes* *53*, 3267-3273.
- Rodriguez, C.I., Buchholz, F., Galloway, J., Sequerra, R., Kasper, J., Ayala, R., Stewart, A.F., and Dymecki, S.M. (2000). High-efficiency deleter mice show that FLPe is an alternative to Cre-loxP. *Nat Genet* *25*, 139-140.

Smyth, G.K. (2004). Linear models and empirical bayes methods for assessing differential expression in microarray experiments. *Stat Appl Genet Mol Biol* 3, Article3.

Song, W.J., Mondal, P., Li, Y., Lee, S.E., and Hussain, M.A. (2013). Pancreatic beta-cell response to increased metabolic demand and to pharmacologic secretagogues requires EPAC2A. *Diabetes*.

Song, W.J., Seshadri, M., Ashraf, U., Mdluli, T., Mondal, P., Keil, M., Azevedo, M., Kirschner, L.S., Stratakis, C.A., and Hussain, M.A. (2011). Snapin mediates incretin action and augments glucose-dependent insulin secretion. *Cell Metab* 13, 308-319.

Subramanian, A., Tamayo, P., Mootha, V.K., Mukherjee, S., Ebert, B.L., Gillette, M.A., Paulovich, A., Pomeroy, S.L., Golub, T.R., Lander, E.S., *et al.* (2005). Gene set enrichment analysis: a knowledge-based approach for interpreting genome-wide expression profiles. *Proc Natl Acad Sci U S A* 102, 15545-15550.
